# Supplementary material
Source: Royal Society of Chemistry journal article supplement (doi:10.1039/d6bm00447d)
Supplement: d6bm00447d1.pdf [file d6bm00447d1.pdf]

## Supporting Information

### Esterase-activated celastrol delivery system suppressed steatosis-related hepatocellular carcinoma progression

Zile Shao<sup>1</sup>, Yangla Xie<sup>2</sup>, Yidan Shen<sup>3</sup>, Yiyang Sun<sup>1</sup>, Long Zhang<sup>4</sup>, Nasha Qiu<sup>1,2\*</sup>, Xiao Xu<sup>1,3,5\*</sup>

<sup>1</sup> The Fourth School of Clinical Medicine, Zhejiang Chinese Medical University, Hangzhou First People's Hospital, Hangzhou 310053, China

<sup>2</sup> Key Laboratory of Integrated Oncology and Intelligent Medicine of Zhejiang Province, Affiliated Hangzhou First People's Hospital, School of Medicine, Westlake University, Hangzhou 310006, China

<sup>3</sup> Zhejiang University School of Medicine, Hangzhou 310058, China

<sup>4</sup> Hangzhou Normal University, Hangzhou 311121, China

<sup>5</sup> Hepatobiliary Center, The First Affiliated Hospital of Nanjing Medical University Nanjing 210000, China

\*: Corresponding author

Nasha Qiu: qiunasha@zju.edu.cn

Xiao Xu: zjxu@zju.edu.cn

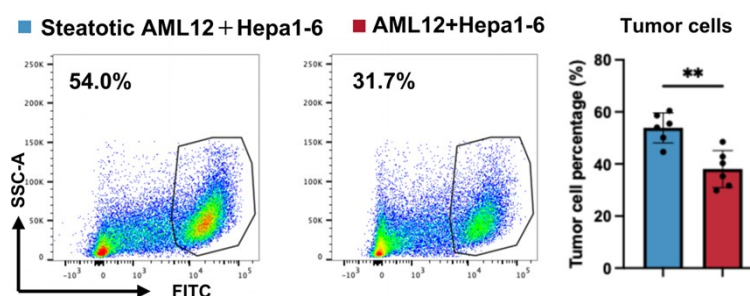

**Figure S1.** Flow cytometry profiles and comparison of quantification of Hepa 1-6-GFP tumor cells in steatotic and conventional tumors. Data are presented as mean  $\pm$  SD of biological replicates (n = 6). (\*\*\*\*p < 0.0001; \*\*\*P < 0.001; \*\* P < 0.01; \* P < 0.05; n.s. no significance)

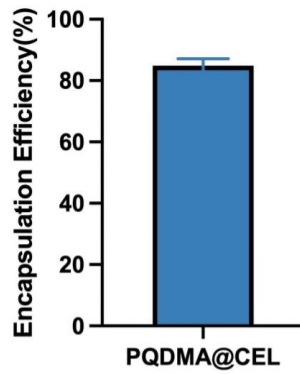

**Figure S2.** Encapsulation efficiency of the optimized PQDMA@CEL NPs.

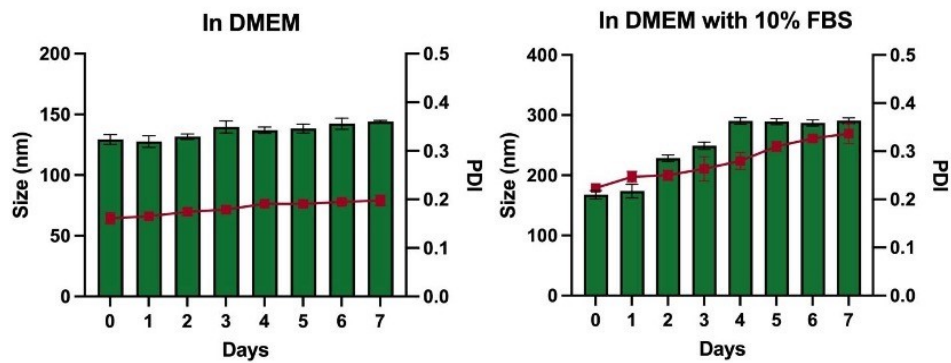

**Figure S3.** Stabilities of PQDMA@CEL NPs in DMEM with or without 10% FBS.

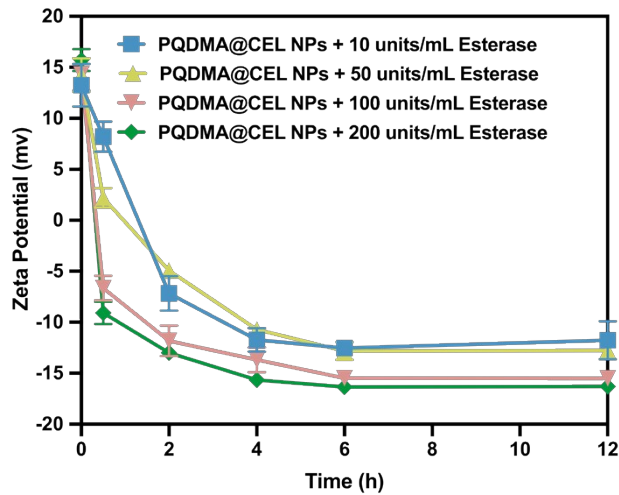

**Figure S4.** Zeta potential measurement of PQDMA@CEL NPs in the presence of different esterase conditions.

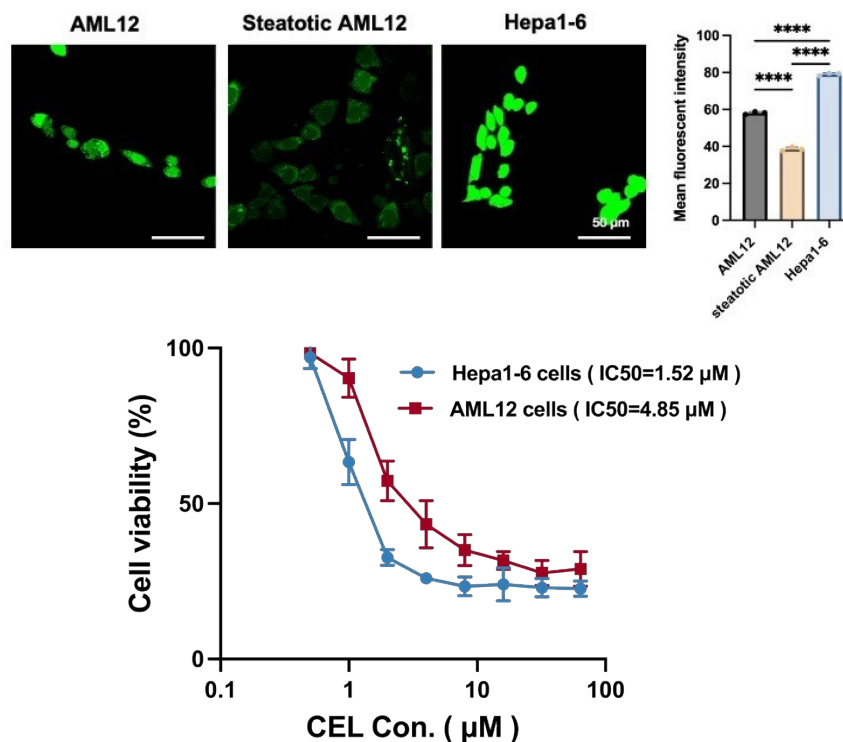

**Figure S5.** Esterase expression levels of AML12 cells, steatotic AML12 cells, and Hepa1-6 cells based on fluorescein diacetate method (esterase: 5 µg/mL) and cytotoxicities of PQDMA@CEL NPs on Hepa1-6 cells and AML12 cells of 24h incubation. Scale bar: 50 µm. Data are presented as mean ± SD of biological replicates (n = 3). (\*\*\*\*p < 0. 0001; \*\*\*P <0.001; \*\* P <0.01; \* P <0.05; n.s. no significance)

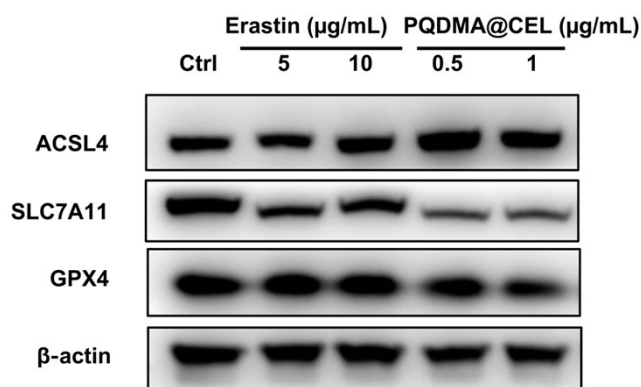

**Figure S6.** Western blot analysis of ACSL4, SLC7A11, and GPX4 protein expression in Hepa1-6 cells treated with PQDMA@CEL NPs, with erastin used as a positive control.

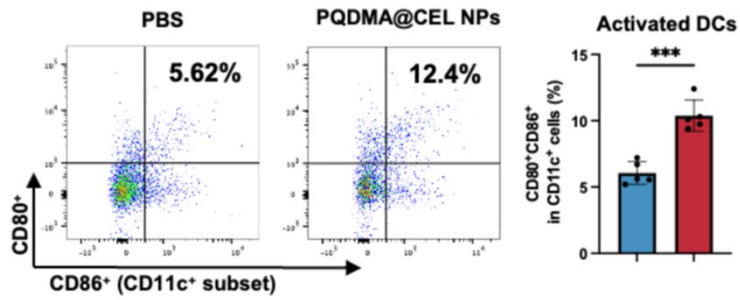

**Figure S7.** Representative flow cytometry profile and quantification of activated DCs in draining lymph nodes. Data are presented as mean  $\pm$  SD of biological replicates (n = 5). (\*\*\*\*p < 0.0001; \*\*\*P < 0.001; \*\* P < 0.01; \* P < 0.05; n.s. no significance)

Supplementary table 1.

| Antibodies              | Company       | Catalog  | Application |
|-------------------------|---------------|----------|-------------|
| Hoechst 33342           | Invitrogen    | H3570    | IF          |
| DiD cell label solution | Invitrogen    | V22887   | IF          |
| Lyso-Tracker Green      | Beyotime      | C1047S   | IF          |
| Mito-Tracker Deep Red   | Beyotime      | C1034-50 | IF          |
| Annexin V /PI Kit       | LIANKE BIO    | A503441  | FC          |
| Cell Counting Kit 8     | APE BIO       | K1018    |             |
| Ms CD45 APC-Cy7 30-F11  | BD Pharmingen | 557659   | Flow        |
| Ms CD3ePE-Cy7 145-2C11  | BD Pharmingen | 552774   | Flow        |
| Ms CD4 FITC RM4-5       | BD Pharmingen | 553046   | Flow        |
| Ms CD8a BV605 53-6.7    | BD Horizon    | 563152   | Flow        |
| CD11b Alexa 700 M1/70   | BD Pharmingen | 557960   | Flow        |
| Ms F4/80 BV421 T45-2342 | BD Horizon    | 565411   | Flow        |
| Ms CD86 BB700 GL1       | BD Pharmingen | BB700    | Flow        |
| Ms CD11C PE-Cy7 HL3     | BD Pharmingen | 558079   | Flow        |
| Ms CD25 BV421           | BD Horizon    | 564370   | Flow        |
| Ms IFN-Gma R718         | BD Horizon    | 567061   | Flow        |
